# Supplementary material for: Schizophrenia, amphetamine-induced sensitized state and acute amphetamine exposure all show a common alteration: increased dopamine D2 receptor dimerization
Source: Springer Nature journal article supplement (doi:10.1186/1756-6606-3-25), 2010-09-02
Supplement: Additional file 1 [file 1756-6606-3-25-s1.pdf]

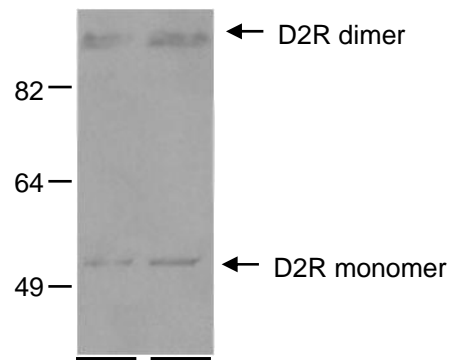

**Additional File 1. Specificity of D2R antibody.** Western blot analysis of dopamine receptor D2 dimer and monomer expression in rat striatal extracts (left lane) and in human striatal extracts (right lane).
